# Supplementary material for: Biomimetic silica deposition promoted by sub-5 μm complexes of dicarboxylic acids/polyethyleneimine microballs: a new approach to tuning silica structures using messenger-like dicarboxylic acids
Source: Royal Society of Chemistry journal article supplement (doi:10.1039/c7ra12413a), 2017-12-20
Supplement: c7ra12413a1.pdf [file c7ra12413a1.pdf]

## Supporting Information

### **Biomimetic silica deposition promoted by sub-5 $\mu\text{m}$ complexes of dicarboxylic acids/polyethyleneimine microballs: a new approach of tuning silica structures using messenger-like organic acids**

Daiki Soma and Ren-Hua Jin\*

Department of Material and Life Chemistry, Kanagawa University,

3-2-7 Rokkakubashi, Yokohama 221-8686, Japan

Corresponding author: [rhjin@kanagawa-u.ac.jp](mailto:rhjin@kanagawa-u.ac.jp)

**Control experiments of complexations and silica deposition employing comb-like polyethylemneimine cPEI.**

**1) General scheme of control experiments**

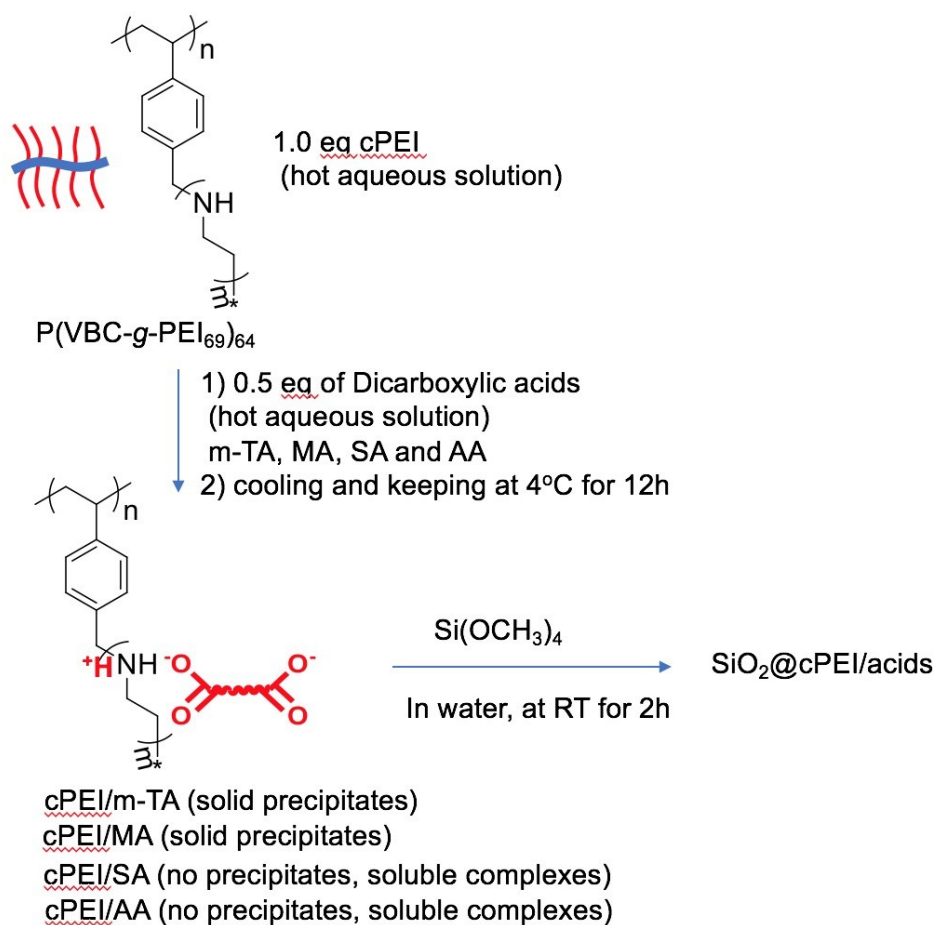

## 2) Complexation of cPEI with meso-tartaric acid

Comb-like polymer P(CMS-g-PEI<sub>69</sub>)<sub>64</sub> (cPEI) was prepared according to our previous reports (D.-D. Yao and R.-H. Jin, *Polym. Chem.*, 2015, **6**, 2255-2263; D.-D. Yao, H. Kubosawa, D. Soma and R.-H. Jin, *Polymer*, 2016, **86**, 120-128). The preparation of cPEI/m-TA complex was as follows: Firstly, the mixture containing cPEI (0.04 g, 0.5 mmol) and water (5 mL) was heated up to about 80 °C to dissolve cPEI. To this cPEI hot solution, a hot aqueous solution containing m-TA (0.25 mmol, 0.04 g) and water (5 mL) was added, and stirred at 80 °C for 5 min. After then, naturally cooled, and allowed to stand at room temperature, and adjusted to pH 4 with NH<sub>3</sub> or HCl. Then, this mixture was cooled and left at 4 °C for 12 h. Finally, the precipitates were corrected by centrifugation, and washed with distilled water and acetone, and dried under ambient condition.

### **3) Complexation of cPEI with mucic acid**

A mixture containing cPEI (0.04 g, 0.5 mmol) and 1M HCl (10 mL) were heated up to about 80 °C to obtain cPEI solution. To this solution, a hot solution of DA (0.25 mmol) dissolved in 1M NH<sub>3</sub> (10 mL) was added, and stirred at 80 °C for 5 min. After naturally cooling to room temperature, the pH value of the mixture was adjusted about 3 with NH<sub>3</sub> or HCl. Then, this mixture was cooled and left at 4 °C for 12 h. The precipitates were collected by centrifugation, and washed with distilled water and acetone, and finally dried under ambient condition.

### **4) Silica hybridization of cPEI/*m*-TA (MA) with TMOS**

TMOS (1 mL) was added into a dispersion of cPEI/*m*-TA (or MA) in water (10 mL) followed by stirred at room temperature for 2 h. After then, the precipitates were collected by centrifugation, and washed with distilled water and acetone, finally dried under room temperature.

### **5) Silica deposition in complexes solution of cPEI/SA (or AA)**

A mixture containing cPEI (0.04 g, 0.5 mmol) and water (10 mL) was heated up to about 80 °C to dissolve cPEI. To this cPEI hot solution, a hot aqueous solution of succinic acid (or adipic acid) (0.25 mmol) dissolved in water (10 mL) was added, and stirred at 80 °C for 5 min. After that, naturally cooled, and allowed to stand at room temperature. And then TMOS (1 mL) was added into the complex solution, stirred at room temperature for 2 h. Taking 1 mL of liquid from the resulting opaque solution into 3 mL of ethanol and the mixture was cast on silicon wafer and dried at room temperature for SEM observation.

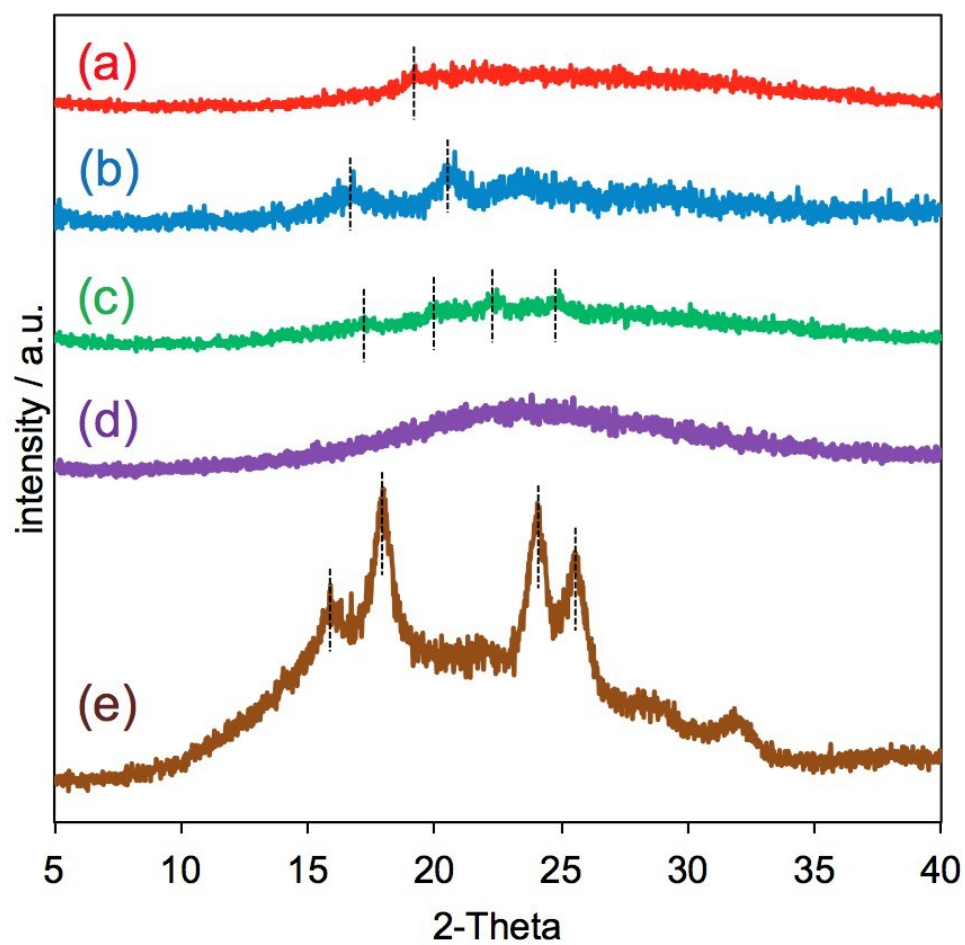

**Fig. S1.** XRD patterns of  $\mu$ -PSt-*g*-LPEI (e) and  $\mu$ -PSt-*g*-PEI/dicarboxylic acids complexes associated with m-TA (a), MA (b), SA (c) and AA (d).

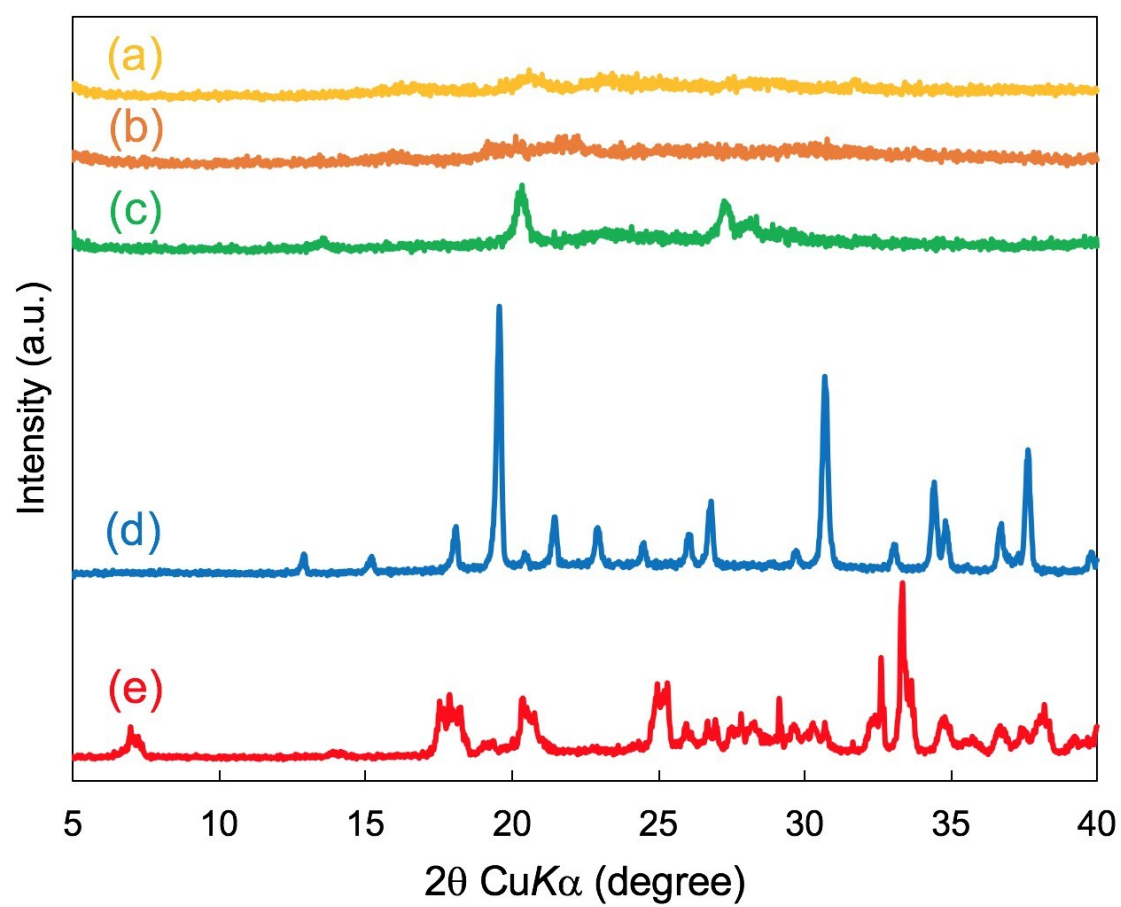

**Fig. S2.** XRD patterns of (a) cPEI/*m*-TA (b) cPEI/MA, (c) cPEI, (d) MA, (e) *m*-TA.

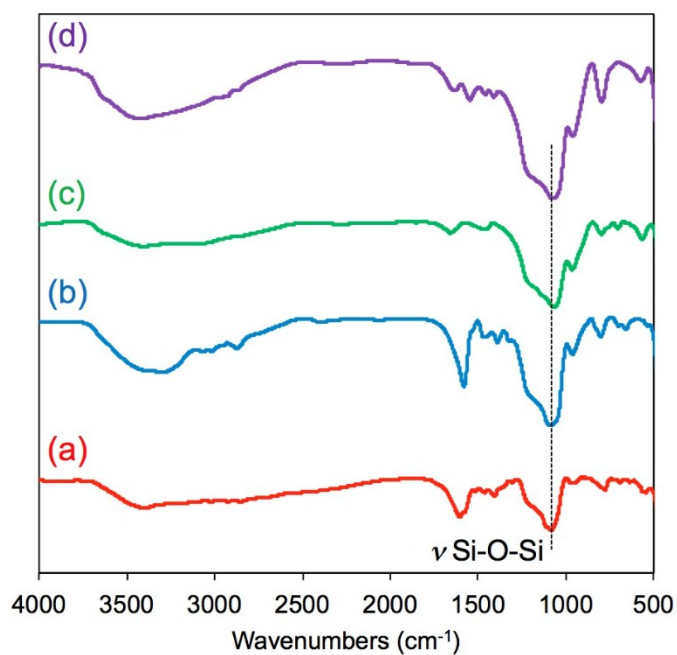

**Fig. S3.** FT-IR spectra of (a) m-PSt-g-PEI/m-TA@SiO<sub>2</sub> (b) m-PSt-g-PEI/MA@SiO<sub>2</sub> (c) m-PSt-g-PEI/SA@SiO<sub>2</sub> and (d) m-PSt-g-PEI/AA@SiO<sub>2</sub> .

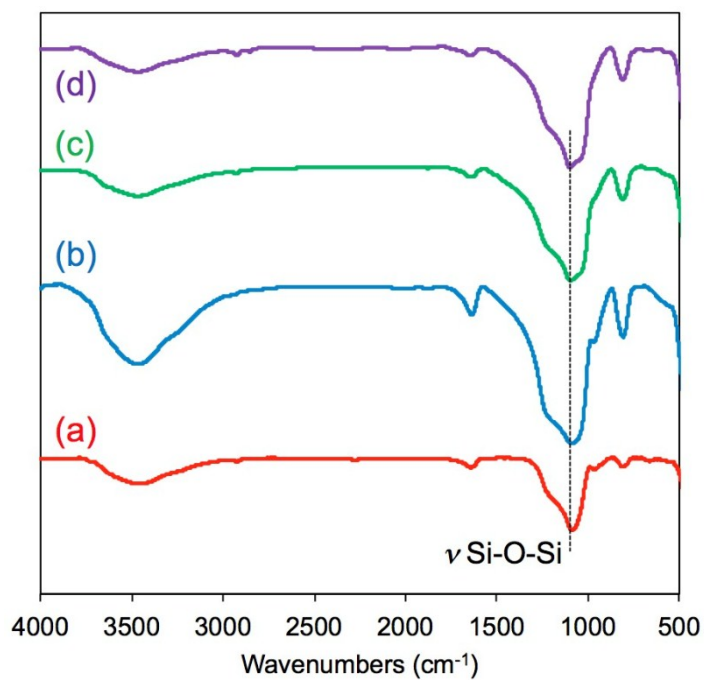

**Fig. S4.** FT-IR spectra after calcination of *m*-PSt-g-PEI/dicarboxylic acid@SiO<sub>2</sub>. (a) m-TA, (b) MA, (c) SA, (d) AA.

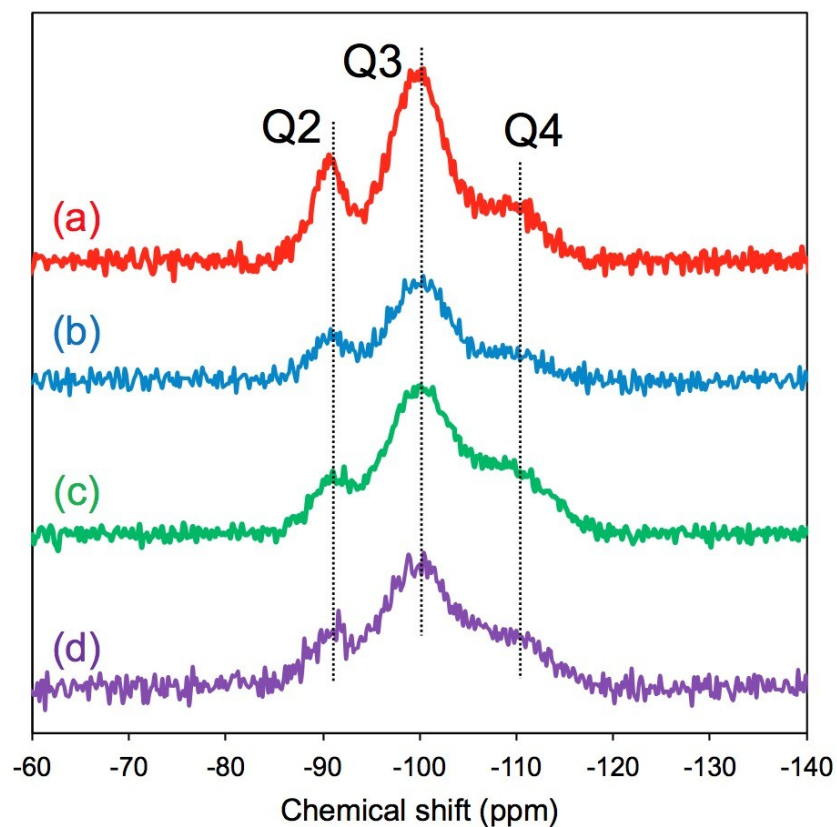

**Fig. S5.**  $^{29}\text{Si}$  CP/MAS NMR spectra of calcined  $\mu\text{-PSt-g-PEI/dicarboxylic acid@SiO}_2$ . (a) m-TA, (b) MA, (c) SA, (d) AA..

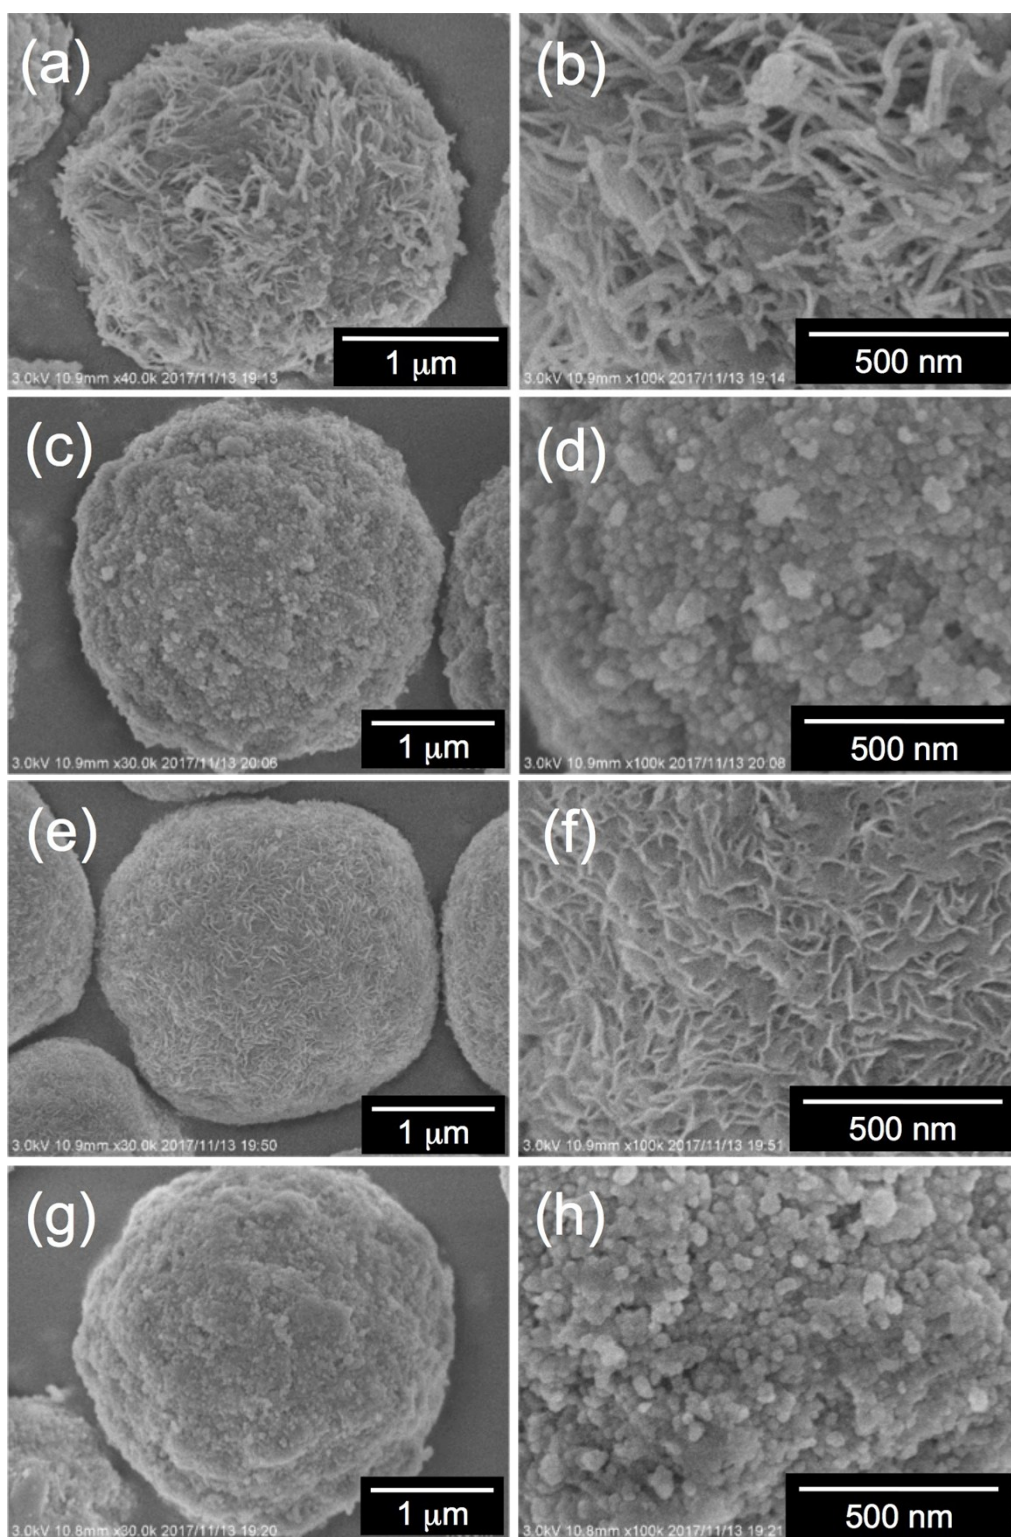

**Fig. S6.** SEM images (of magnified areas) after calcined of  $\mu$ -PSt-g-PEI/DD@SiO<sub>2</sub>. DD (dicarboxylic acid): (a, b) m-TA, (c, d) SA, (e, f) MA, (g, h) AA.

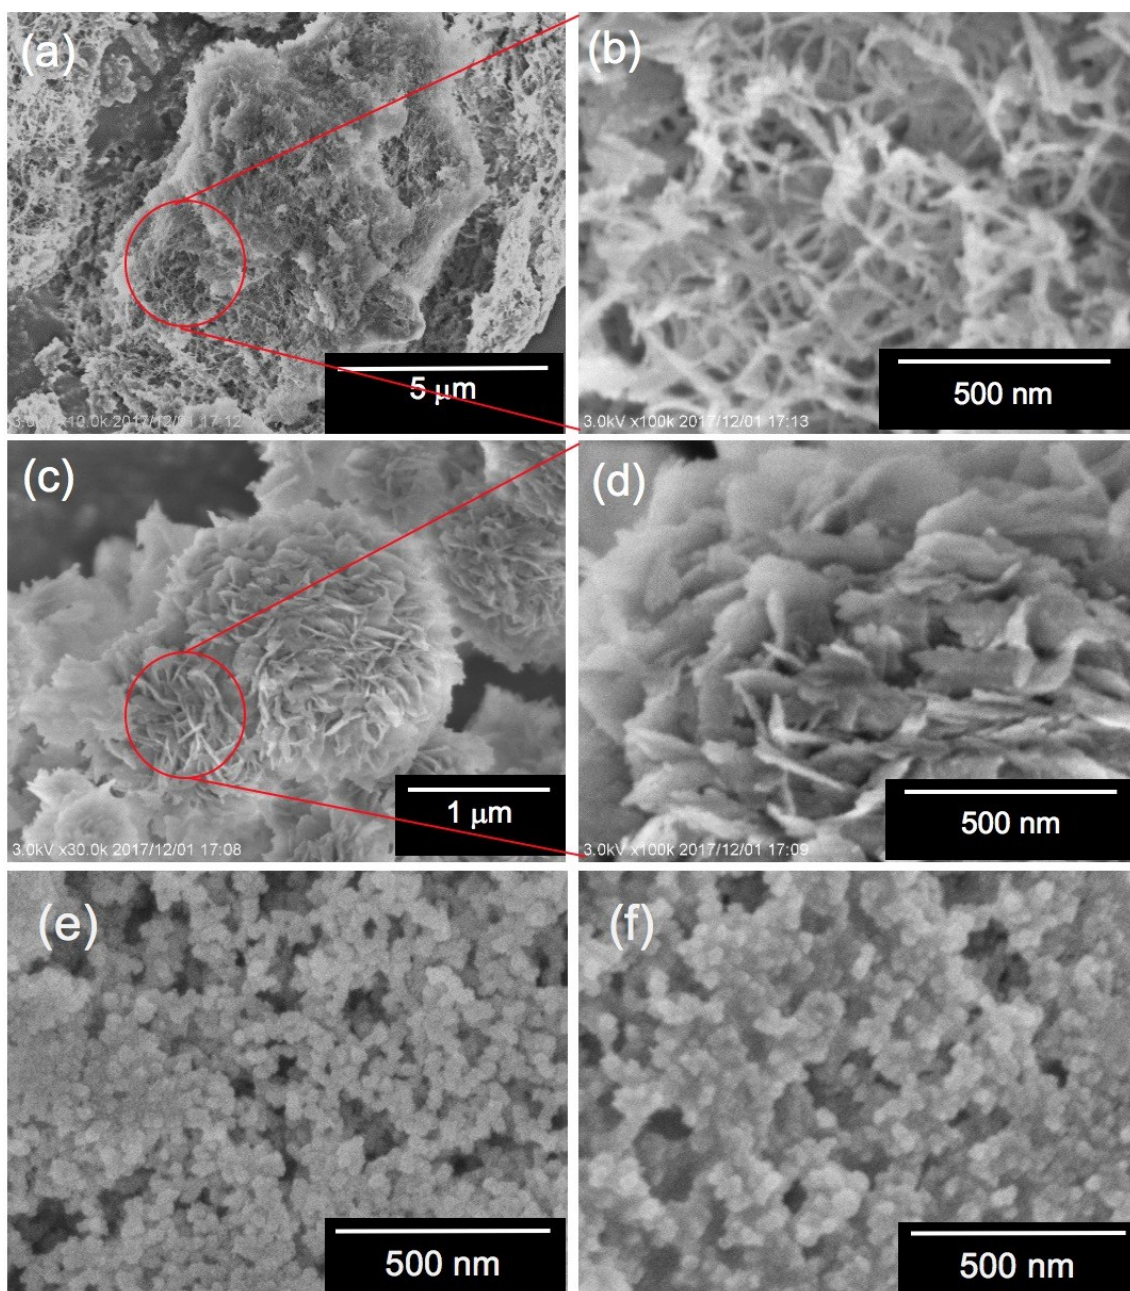

**Fig. S7.** SEM images of the silica powders templated by the complexes of cPEI/*m*-TA (a, b), cPEI/MA (c, d), cPEI/SA (e) and cPEI/AA (f). The images of (b) and (d) are the magnified observation from the red-circular areas, respectively.

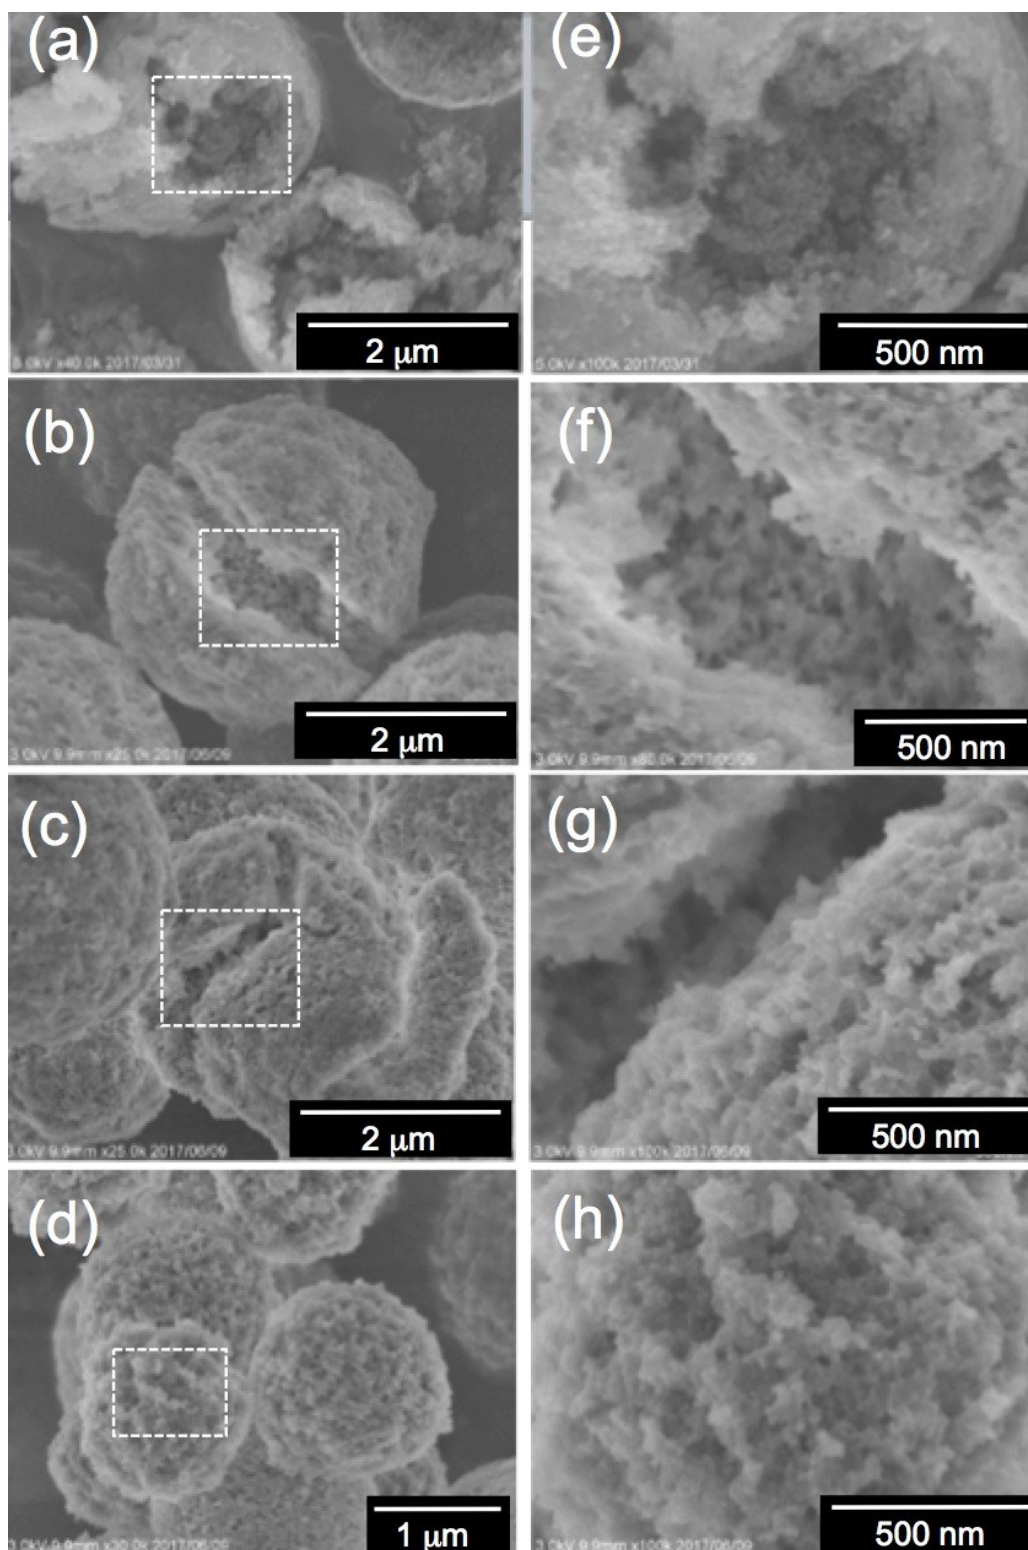

**Fig. S8.** SEM images (of magnified area) after APS treatment of calcination of  $\mu$ -PSt-g-PEI/dicarboxylic acid@SiO<sub>2</sub> mediated by different kinds of dicarboxylic acid: (a, e) m-TA, (b, f) SA, (c, g) MA, (d, h) AA.

**Table S1.** BET surface area of the calcined  $\mu$ -PSt-*g*-PEI/dicarboxylic acid@SiO<sub>2</sub>

| Organic acid      | BET surface area (m <sup>2</sup> /g) |
|-------------------|--------------------------------------|
| Mesotartaric acid | 430.0                                |
| Succinic acid     | 133.3                                |
| Mucic acid        | 615.0                                |
| Adipic acid       | 96.7                                 |

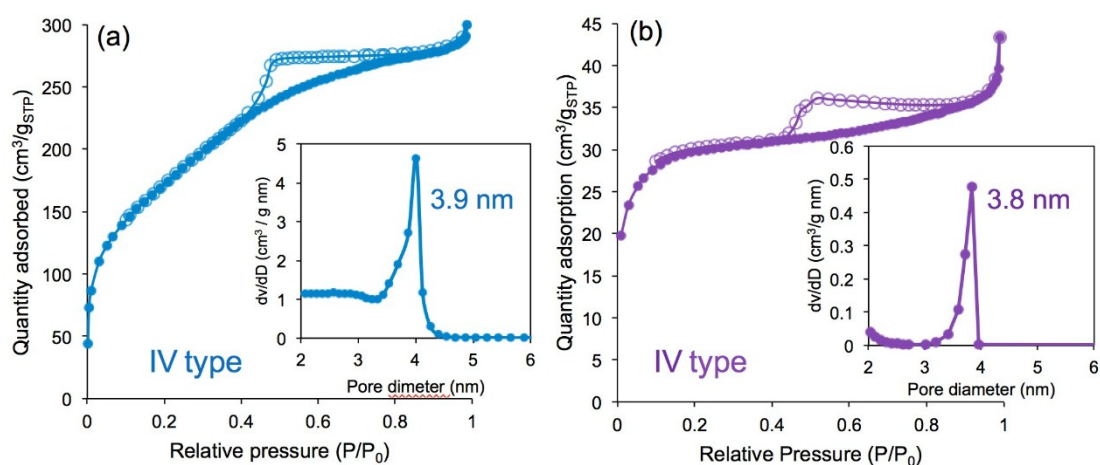

**Fig. S9.** N<sub>2</sub> adsorption desorption isotherms and pore size distribution of the calcined of  $\mu$ -PSt-*g*-PEI/dicarboxylic acid@SiO<sub>2</sub> mediated from (a) Mucic acid, (b) Adipic acid. Open dots: desorption; close dots: adsorption.
